# Supplementary material for: Novel β-ketoiminato complexes of zirconium: synthesis, characterization and evaluation for solution based processing of ZrO2thin films
Source: Royal Society of Chemistry journal article supplement (doi:10.1039/c3dt52335g), 2013-11-11
Supplement: c3dt52335g.pdf [file c3dt52335g.pdf]

# Novel $\beta$ -ketoiminato complexes of Zirconium: Synthesis, characterization and evaluation for solution based processing of $ZrO_2$ thin films

## Supporting Information

Manish Banerjee<sup>1</sup>, Rüdiger W. Seidel<sup>2</sup>, Manuela Winter<sup>1</sup>, Hans-Werner Becker<sup>3</sup>, Detlef Rogalla<sup>3</sup>, Anjana Devi\*<sup>1</sup>

1. Inorganic Materials Chemistry, Faculty of Chemistry and Biochemistry, Ruhr-University Bochum, 44801 Bochum, Germany
2. Analytical Chemistry, Faculty of Chemistry and Biochemistry, Ruhr-University Bochum, 44801 Bochum, Germany
3. Central Unit for Ion beams and Radionuclides (RUBION), Ruhr-University Bochum, D-44780 Bochum, Germany

\*Email: [anjana.devi@rub.de](mailto:anjana.devi@rub.de)

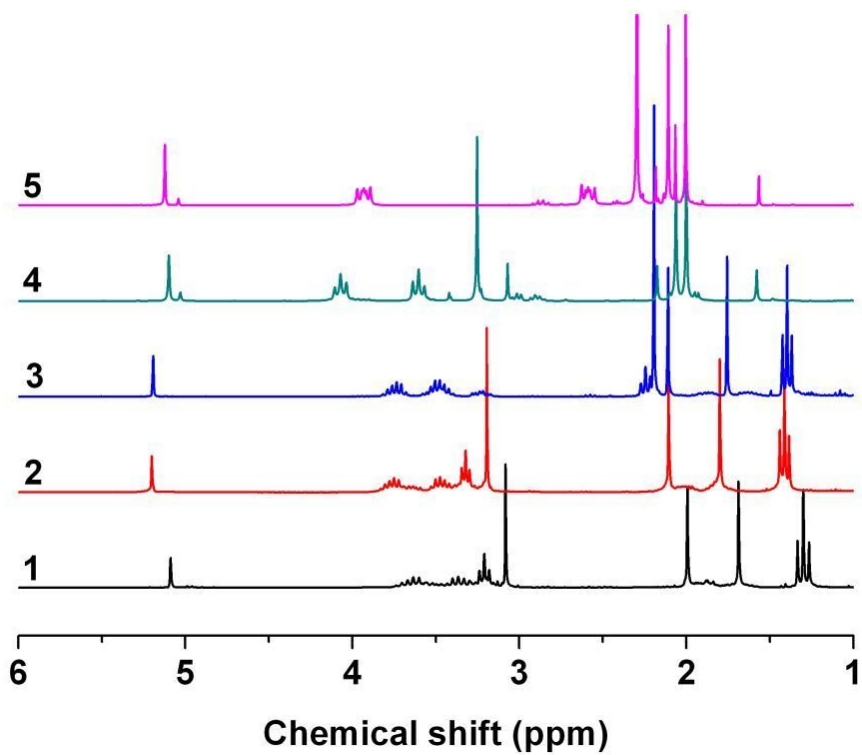

**Figure 1:**  $^1\text{H}$  NMR plot of complexes 1-5 in benzene- $\text{d}_6$ .

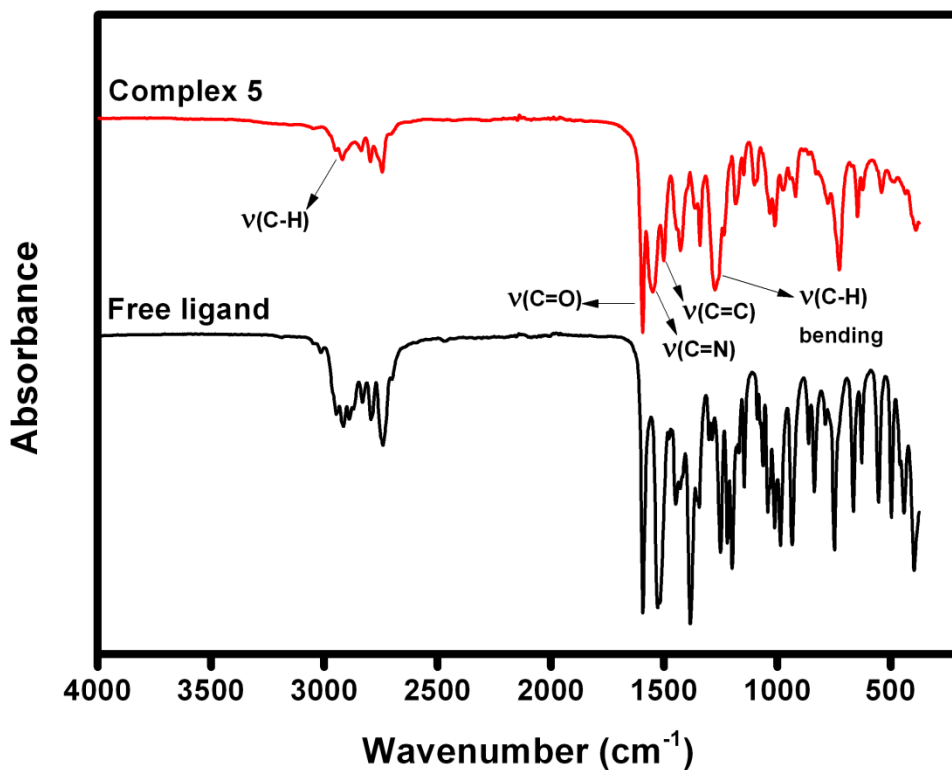

**Figure 2:** IR spectrum of **5** overlaid with the free ligand (Hdeap).

**Table 1:** EI-MS fragmentation pattern of complexes **4** and **5**.

| <b>4</b>                 |                   | <b>5</b>                |                   |
|--------------------------|-------------------|-------------------------|-------------------|
| <b>Fragments</b>         | <b>Mass [m/z]</b> | <b>Fragments</b>        | <b>Mass [m/z]</b> |
| M-3L-Me                  | 230.3             | M-L                     | 579.2             |
| M-3L-2Me                 | 216.3             | M-L-L <sub>1</sub>      | 538.5             |
| M-3L-L <sub>1</sub>      | 187.2             | M-2L                    | 427.2             |
| M-3L-L <sub>1</sub> -Me  | 172.2             | M-2L-NMe <sub>2</sub>   | 384.1             |
| M-3L-L <sub>1</sub> -2Me | 157.2             | M-2L-L <sub>1</sub>     | 370.1             |
|                          |                   | M-3L                    | 259.0             |
|                          |                   | M-3L-L <sub>2</sub>     | 186.9             |
|                          |                   | M-3L-L <sub>2</sub> -Me | 175.2             |

For **4**, L= ketoiminate; L<sub>1</sub>=-CH<sub>2</sub>NMe<sub>2</sub>; L<sub>2</sub>=-CH<sub>2</sub>CH<sub>2</sub>NMe<sub>2</sub>. For **5**, L= ketoiminate; L<sub>1</sub>= -CH<sub>2</sub>CH<sub>2</sub>OMe. M= molecular ion.

**Table 2:** Film composition determined from RBS and NRA for ZrO<sub>2</sub> film on Si(100) at different annealing temperatures.

| <b>Annealing temperature [°C]</b> | <b>Zr/O (RBS)</b> | <b>C [%] (NRA)</b> | <b>N [%] (NRA)</b> |
|-----------------------------------|-------------------|--------------------|--------------------|
| 400                               | 0.4               | 19                 | 0.4                |
| 600                               | 0.4               | 11                 | 0.6                |
